# Supplementary material for: Functionalisation of polybutylene succinate nanocomposites: from structure to reinforcement of UV-absorbing and mechanical properties
Source: Royal Society of Chemistry journal article supplement (doi:10.1039/c2ra20579c), 2012-01-01

## Supporting Information

Supporting information is available from the Wiley Online Library or from the author.

5 **Figure S.I.1.** CO<sub>2</sub> emission rates after 30 hours of irradiation for PBS organic blends and PBS nanocomposites.

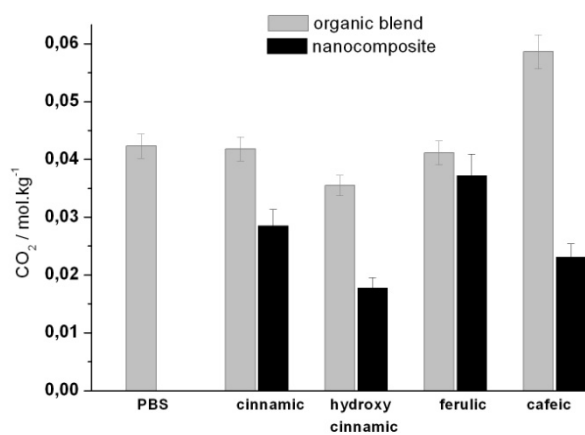

10

**Figure S.I.2.** Fluorescence spectra of PBS organic blends (a) and PBS nanocomposites (b) after 70 hours of irradiation.

a)

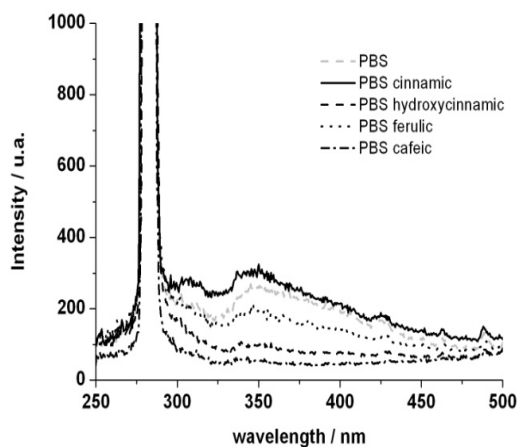

b)

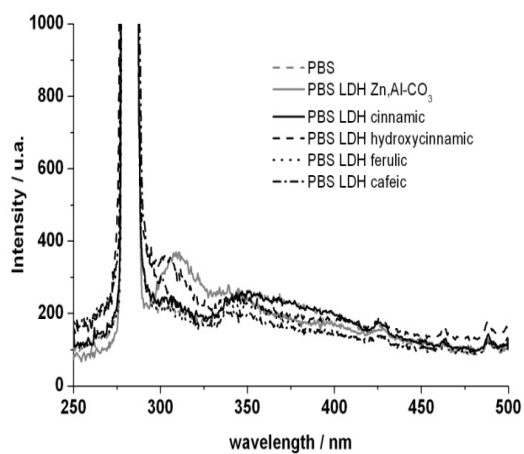

Supplement: c2ra20579c.pdf [file c2ra20579c.pdf]
